# Supplementary material for: The Met Office Weather Game: investigating how different methods for presenting probabilistic weather forecasts influence decision-making
Source: Copernicus journal article supplement (doi:10.5194/gc-2-101-2019), 2019-07-19
Supplement: Supplementary file 1 [file gc-2-101-2019-supplement.pdf]

Supplement of Geosci. Commun., 2, 101–116, 2019  
<https://doi.org/10.5194/gc-2-101-2019-supplement>  
© Author(s) 2019. This work is distributed under  
the Creative Commons Attribution 4.0 License.

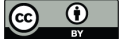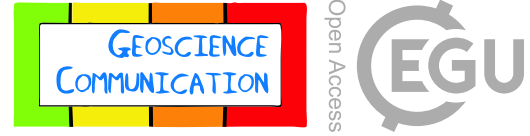

*Supplement of*

## **The Met Office Weather Game: investigating how different methods for presenting probabilistic weather forecasts influence decision-making**

**Elisabeth M. Stephens et al.**

*Correspondence to:* Elisabeth M. Stephens ([elisabeth.stephens@reading.ac.uk](mailto:elisabeth.stephens@reading.ac.uk))

The copyright of individual parts of the supplement might differ from the CC BY 4.0 License.

## Supplementary Information

### S1. Preliminary / Socio-Demographic Questions

Age – The exact age of the participant asked for, and for UK Data Protection reasons this was banded into one of 6 groups; Under 16, 16-25, 26-35, 36-45, 46-55, or Over 55.

First 3 characters of post / zip code: For Data Protection reasons this was limited to the first half of the post code, and was asked so as to identify the geographical location of participants.

Gender (Male / Female)

Have you played the game before? (Yes / No) – so as to enable us to eliminate repeat players from the analysis. This will rely on participant honesty.

Educational Attainment – The participant was asked to select all qualifications that applied to them. For the analysis we took the highest level of attainment, and assumed that professional qualifications were at a level higher than a degree. This of course is not necessarily the case. A list of the options is shown below, for comparison with the US system, the first is a secondary school level qualification, the second are vocational qualifications, and the third contains qualifications (largely) for university entry.

- O levels / CSEs / GCSEs (any grade) / Foundation Level Diploma
- NVQ Level / GNVQ (any level) / City & Guilds Equivalent / BTEC or RSA Diploma
- A Level / AS Level / VCES
- Degree (for example BA BSC) or higher degree (for example MA, Ph.D, PGCE)
- Professional qualifications (for example accountancy) other vocational / work related qualifications
- Foreign qualifications
- No formal qualifications

Have you ever been taught or learnt about how scientists use computers to model the environment? (Yes, No, I'm not sure) – Asked to separate experts from non-experts.

Do you often make decisions or judgements based on risk, chance or probability? (Yes, No, I'm not sure) – Asked as a potential indication of risk awareness.

### S2. ANOVA Test

For statistical testing the Presentation Types have been coded by their information content and their format:

Content: 1= deterministic, 2=rating, 3=probability

Format: 1=text only, 2=graphic, 3=graphic and text

Our intention was to use a mixed model of within and between factors, but we were heavily limited by computational power due to the size of the matrix created. We were therefore limited to a more simple ANOVA with main-effects and all 2-way interactions, carried out in 'R' using the following script:

anova=aov(squareerror~(age\*qualifications+age\*content+age\*format+age\*week\_order+age\*gender+age\*week+qualifications\*content+qualifications\*format+qualifications\*week+qualifications\*week\_order+qualifications\*gender+content\*format+content\*week+content\*week\_order+content\*gender+format\*week+format\*week\_order+format\*gender+week\*week\_order+week\*gender+week\*week\_order\*gender),data=results)

|                           | Df | Sum Sq | Mean Sq | F value  | P Value   |
|---------------------------|----|--------|---------|----------|-----------|
| Age                       | 5  | 32.7   | 6.5321  | 217.1215 | < 2.2e-16 |
| Qualifications            | 6  | 17     | 2.8332  | 94.174   | < 2.2e-16 |
| Content                   | 1  | 5.4    | 5.4033  | 179.5995 | < 2.2e-16 |
| Format                    | 1  | 0.2    | 0.1812  | 6.0214   | 0.014135  |
| week_order                | 3  | 42.3   | 14.1116 | 469.0572 | < 2.2e-16 |
| Gender                    | 1  | 2      | 1.9698  | 65.4739  | 5.94E-16  |
| Week                      | 3  | 22.4   | 7.4617  | 248.0209 | < 2.2e-16 |
| age:qualifications        | 30 | 6.5    | 0.215   | 7.148    | < 2.2e-16 |
| age:content               | 5  | 0.2    | 0.0364  | 1.2089   | 0.301918  |
| age:format                | 5  | 0.9    | 0.1734  | 5.7621   | 2.53E-05  |
| age:week_order            | 15 | 0.6    | 0.0426  | 1.4143   | 0.13012   |
| age:gender                | 5  | 0.6    | 0.1172  | 3.8956   | 0.001566  |
| age:week                  | 15 | 2.6    | 0.1708  | 5.678    | 7.90E-12  |
| qualifications:content    | 6  | 0.5    | 0.0868  | 2.8864   | 0.008184  |
| qualifications:format     | 6  | 0.6    | 0.1063  | 3.5346   | 0.001685  |
| qualifications:week       | 18 | 1.2    | 0.0676  | 2.2463   | 0.001824  |
| qualifications:week_order | 18 | 0.8    | 0.0464  | 1.5408   | 0.066241  |
| qualifications:gender     | 6  | 1.5    | 0.2451  | 8.1477   | 7.89E-09  |
| content:format            | 1  | 0.1    | 0.0862  | 2.8661   | 0.090466  |
| content:week              | 3  | 0.9    | 0.2984  | 9.9184   | 1.56E-06  |
| content:week_order        | 3  | 0.5    | 0.1603  | 5.3278   | 0.001143  |
| content:gender            | 1  | 0      | 0.0447  | 1.4873   | 0.22264   |
| format:week               | 3  | 0.2    | 0.068   | 2.2604   | 0.07921   |
| format:week_order         | 3  | 0.3    | 0.0854  | 2.8376   | 0.036526  |
| format:gender             | 1  | 0.1    | 0.0564  | 1.8763   | 0.170756  |
| week_order:week           | 9  | 1.3    | 0.1423  | 4.7294   | 2.60E-06  |
| gender:week               | 3  | 0.2    | 0.0826  | 2.7443   | 0.041442  |
| week_order:gender         | 3  | 0.2    | 0.0607  | 2.0169   | 0.109176  |
| week_order:gender:week    | 9  | 0.6    | 0.0718  | 2.385    | 0.010742  |

**Figure S1: ANOVA Summary Table**

### S3. Example Screenshots

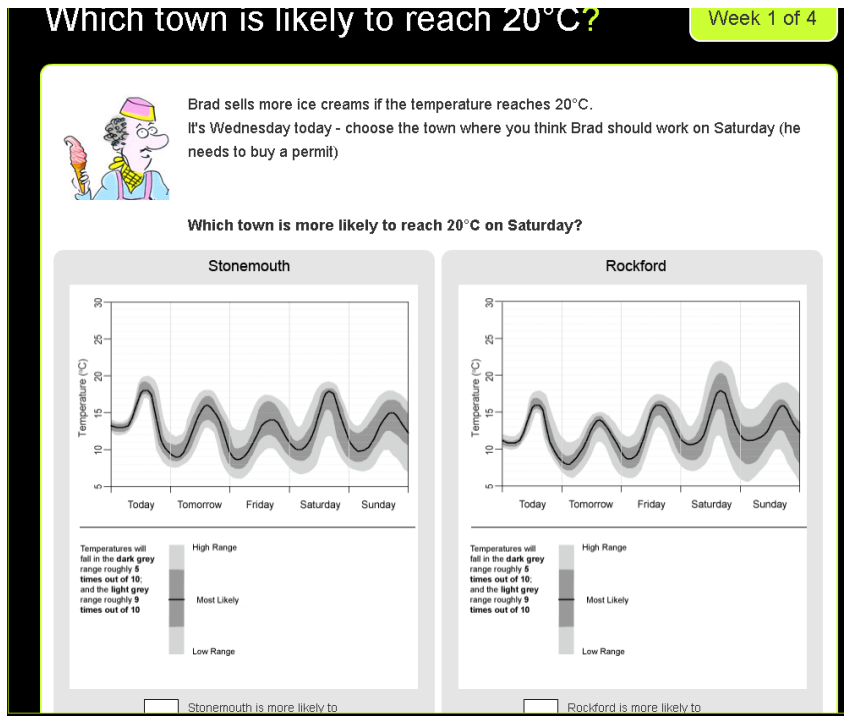

Figure S1: Temperature question - location choice

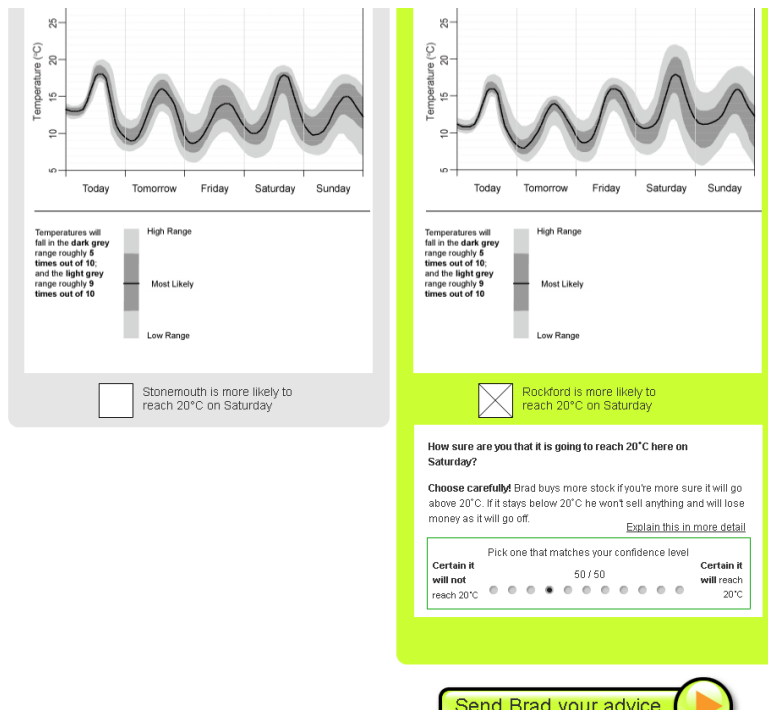

Figure S3: Temperature question - confidence choice



## The shift choice

The interface displays four weather forecast options, each with a corresponding icon and a feedback message:

- light rain showers**: Chance of any rain **HIGH**. Feedback: "You provided good advice, but on this occasion it rained".
- sunny intervals**: Chance of any rain **MED**. Feedback: "Well done - it didn't rain".
- sun**: Chance of any rain **LOW**. Feedback: "Well done - it didn't rain".
- sun**: Chance of any rain **LOW**. Feedback: "Well done - it didn't rain".

Below each forecast is a "Rain confidence" scale from "No Rain" to "Rain", represented by a row of 10 dots. The first scale (for "light rain showers") has the 4th dot from the left filled, indicating a confidence level of approximately 40%. The other three scales have the 1st dot from the left filled, indicating a confidence level of approximately 10%.

A summary box at the bottom states: "Brad bought extra stock and made: £37 because it all sold out".

Figure S6: Example of feedback provided to participants at the end of each 'week'

# Thank you for helping us!

Brad followed your advice. How well did he do in total?

Overall, your advice gained him

£ 245

Brad thinks you're about as good as a  
**'Red Hot Meteorologist'**

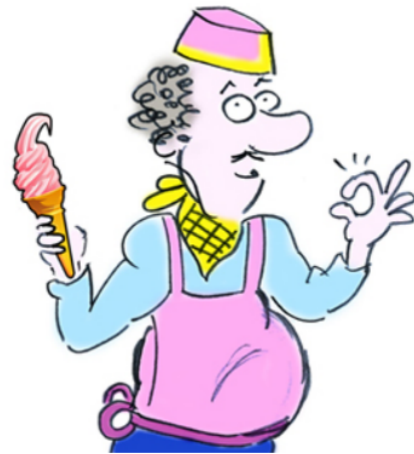

## What now?

If you have any comments on this game that you think might help, please contact us on: [enquiries@metoffice.gov.uk](mailto:enquiries@metoffice.gov.uk).

Please note we will not be replying individually to this feedback.

\* **Play again** - remember that the outcomes will be different next time round

See if different ways of displaying the temperature and rainfall forecasts help improve your score

\* **Share with others** - help us collect data from more people by spreading the word

I scored 245 pounds on the Met Office weather game and was ranked as a 'Red Hot Meteorologist'

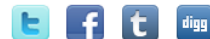

Figure S7: Feedback at end of game

#### S4. Impact of modelling question

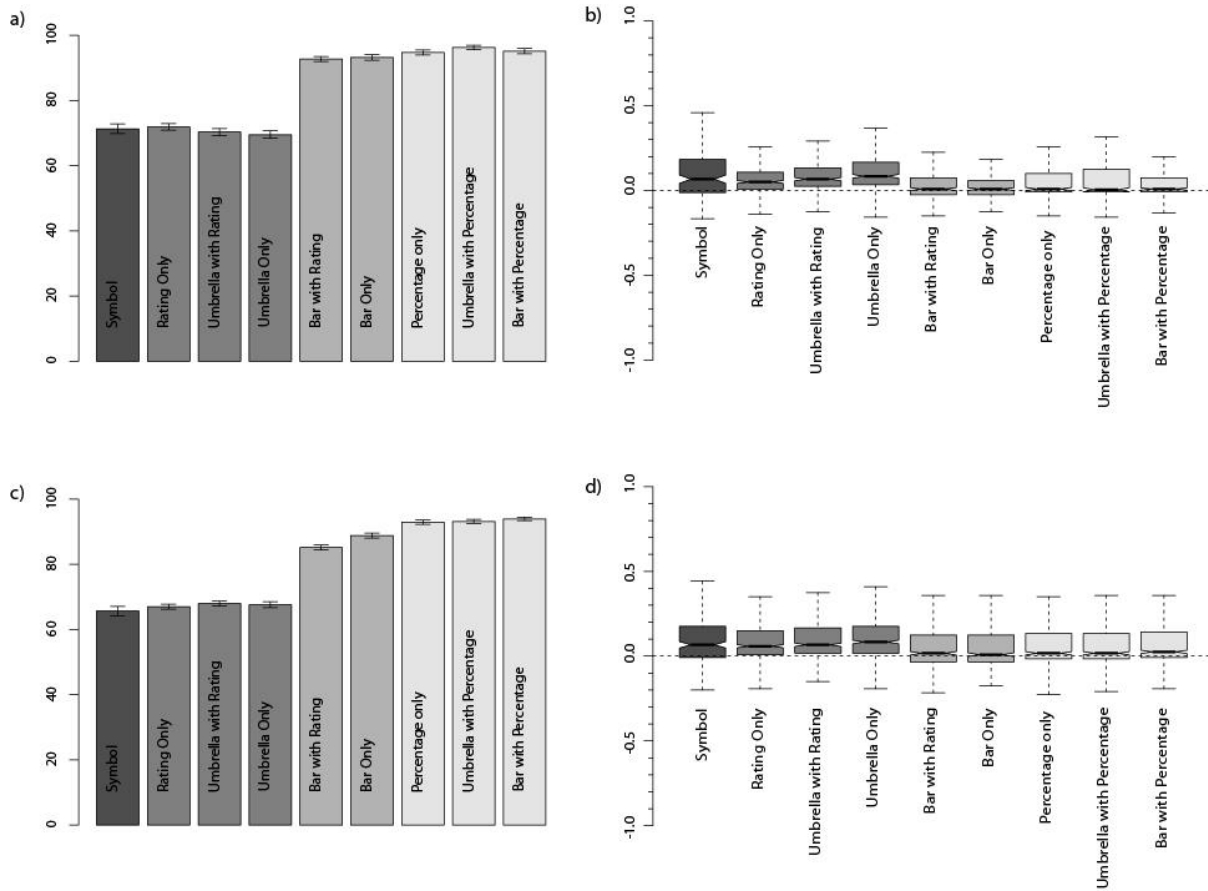

**Figure 2: Differences in outcomes for all rainfall questions depending on if participant answered yes (n=2753, shown in a&b) or no (n=4686, shown in c&d) to "Have you ever been taught or learnt about how scientists use computers to model the environment"?**
